# Supplementary material
Source: PubMed Central journal article supplement (PMC3927978)
Supplement: supp_kwt304_kwt304supp.pdf [file supp_kwt304_kwt304supp.pdf]

## WEB MATERIAL

Birth Weight, Physical Morbidity, and Mortality: A Population-based Sibling-Comparison Study

Quetzal A. Class, Martin E. Rickert, Paul Lichtenstein, and Brian M. D’Onofrio

### Table of Contents

Web Appendix. Description of Swedish population-based registers with references.

Web Table 1. *International Classification of Diseases* codes used to classify outcomes with outcome description.

Web Table 2. Comparison of fit indices across baseline linear and quadratic baseline models for model selection.

Web Table 3. Comparison of the unstandardized linear and quadratic regression coefficients for the baseline, adjusted, and fixed-effects models.

Web Table 4. Parameter estimates of baseline and fixed-effects models using ordinal representation of birth weight.

Web Figure 1. Baseline and fixed-effects parameter estimates when limiting sample to full-term births only.

Web Figure 2. Comparison of the baseline model association between birth weight and offspring outcomes estimated separately for (a) offspring from families with more than one child and (b) offspring from families with only one child.

Web References

## Web Appendix

### Description of Swedish Population-Based Registers With References and Participant Flow for Noncardiac Mortality Outcomes

The data were obtained by linking information available in the following government-maintained, Swedish population-based registries: 1) the Medical Birth Registry includes data on more than 99% of pregnancies in Sweden since 1973 (1, 2); 2) the Multi-Generation Register (3) contains information about biological and adoptive relationships among persons living in Sweden since 1933; 3) the Migration Register contains dates for migration into or out of Sweden; 4) the Cause of Death Register contains dates and causes of all deaths since 1958; 5) the National Patient Registry (4) provides data on all inpatient admissions in Sweden since 1973 and all outpatient care since 2001; every record includes the discharge date, primary discharge diagnosis, and up to 7 secondary diagnoses assigned by the treating medical doctor using WHO's ICD-10 codes (5); 6) the National Crime Register includes detailed information about all criminal convictions of persons aged 15 years (the age of criminal responsibility) or more in lower court since 1973 (6); 7) the National School Register (7) includes grades across subjects for students at the end of grade 9 (approximately age 16 years) since 1983; 8) the Education Register contains information on highest level of formal education completed between 1988 and 2008; and 9) the Longitudinal Integrated Database for Health Insurance and Social Studies (LISA) (8) contains yearly assessments of income, marital status, unemployment status, social welfare status, and education for all individuals aged 16 years or older since 1990.

**Web Table 1.** *International Classification of Diseases* codes used to classify outcomes, with outcome descriptions.

| Outcome                            | Data Source Register | International Classification of Diseases Revision | Codes                                                      | Description                                                                                                                                                                                                                                               |
|------------------------------------|----------------------|---------------------------------------------------|------------------------------------------------------------|-----------------------------------------------------------------------------------------------------------------------------------------------------------------------------------------------------------------------------------------------------------|
| <b>Mortality Outcomes</b>          |                      |                                                   |                                                            |                                                                                                                                                                                                                                                           |
| Mortality after one year           | Cause of Death       | —                                                 | —                                                          | Death after the first year of postnatal life due to any cause                                                                                                                                                                                             |
| Cardiac-related death              | Cause of Death       | 8, 9, 10                                          | All below plus 420–425, 427–429, 440–448, I30–I52, I70–I79 | Death due to cardiac or diabetic related occurrence including all below and others                                                                                                                                                                        |
| <b>Physical Morbidity Outcomes</b> |                      |                                                   |                                                            |                                                                                                                                                                                                                                                           |
| Hypertension                       | HD                   | 8, 9, 10                                          | 401–405, I10–I15                                           | Essential, secondary, and hypertensive disease of the heart and kidney                                                                                                                                                                                    |
| Ischemic heart disease             | HD                   | 8, 9, 10                                          | 410–414, I20–I25                                           | Acute and other myocardial infarction, angina pectoris, other forms of chronic ischemic heart disease including atherosclerotic heart disease and aneurysm of the heart                                                                                   |
| Pulmonary circulation problems     | HD                   | 8, 9, 10                                          | 415–417, 426, 450, I26–I28                                 | Acute pulmonary heart disease, primary pulmonary hypertension, other diseases of pulmonary circulation                                                                                                                                                    |
| Stroke                             | HD                   | 8, 9, 10                                          | 430–438, I60–I69                                           | Subarachnoid, intracerebral, and other intracranial hemorrhage, occlusion and stenosis of pericerebral and cerebral arteries, transient cerebral ischemia, acute, other, and ill-defined cerebrovascular disease, late effects of cerebrovascular disease |
| Type 2 Diabetes Mellitus           | HD                   | 8, 9, 10                                          | 250 (except .x1 and .x3), E11–E14                          | Type 2 diabetes mellitus                                                                                                                                                                                                                                  |

Abbreviation: HD, hospital discharge.

**Web Table 2. Comparison of Akaike information criterion (AIC) values for linear and quadratic candidate baseline models.**

| Outcome                         | Candidate Baseline Model |                             | AIC-min | $\Delta$ AIC |
|---------------------------------|--------------------------|-----------------------------|---------|--------------|
|                                 | Linear Birth Weight      | with Quadratic Birth Weight |         |              |
| <b>Mortality</b>                |                          |                             |         |              |
| <b>Died After 1st Year</b>      | 407651.93                | 407512.95                   | L + Q   | 138.98       |
| <b>Cardiac-related Death</b>    | 84485.01                 | 84365.65                    | L + Q   | 119.36       |
| <b>Physical Morbidity</b>       |                          |                             |         |              |
| <b>Hypertension</b>             | 182314.86                | 182302.94                   | L + Q   | 11.92        |
| <b>Ischemic Heart Disease</b>   | 24605.82                 | 24599.80                    | L + Q   | 6.02         |
| <b>Pulmonary Circulation</b>    | 78602.59                 | 78539.61                    | L + Q   | 62.98        |
| <b>Stroke</b>                   | 121898.24                | 121855.48                   | L + Q   | 42.76        |
| <b>Type 2 Diabetes Mellitus</b> | 608347.78                | 608346.83                   | L + Q   | 0.95         |

Notes: L + Q = baseline model with both linear and quadratic birth weight

The model selection table compares the Akaike Information Criterion (AIC) for the baseline model with linear (L) birth weight only and the baseline model with both linear and quadratic (L+Q) birth weight. The column labeled “AIC-min” indicates which of the two candidate models (L or L+Q) yielded the lowest AIC. The observed difference,  $\Delta$ AIC = AIC<sub>L</sub> – AIC<sub>L+Q</sub>, provides a measure of relative merit that is free of scaling constants and can be interpreted as strength of evidence for model selection purposes (9).

Web Table 3. Comparison of the unstandardized linear and quadratic regression coefficients for the baseline, adjusted, and fixed effects models.

| Outcomes                  | Baseline (Model 2) |       |                |       | Adjusted (Model 3) |       |                |       | Fixed Effects (Model 4) |       |                |       |
|---------------------------|--------------------|-------|----------------|-------|--------------------|-------|----------------|-------|-------------------------|-------|----------------|-------|
|                           | Linear term        |       | Quadratic term |       | Linear term        |       | Quadratic term |       | Linear term             |       | Quadratic term |       |
|                           | b                  | SE    | b              | SE    | b                  | SE    | b              | SE    | b                       | SE    | b              | SE    |
| <b>Mortality</b>          |                    |       |                |       |                    |       |                |       |                         |       |                |       |
| Died After 1st Year       | <b>-0.039</b>      | 0.005 | <b>0.012</b>   | 0.001 | <b>-0.025</b>      | 0.005 | <b>0.012</b>   | 0.001 | <b>-0.061</b>           | 0.011 | <b>0.017</b>   | 0.002 |
| Cardiac-related Death     | -0.004             | 0.016 | <b>0.018</b>   | 0.003 | 0.004              | 0.016 | <b>0.018</b>   | 0.003 | -0.026                  | 0.040 | <b>0.027</b>   | 0.008 |
| <b>Physical Morbidity</b> |                    |       |                |       |                    |       |                |       |                         |       |                |       |
| Hypertension              | <b>-0.043</b>      | 0.008 | <b>0.004</b>   | 0.002 | <b>-0.039</b>      | 0.008 | <b>0.004</b>   | 0.002 | <b>-0.052</b>           | 0.024 | 0.003          | 0.004 |
| Ischemic Heart Disease    | <b>-0.076</b>      | 0.025 | <b>0.010</b>   | 0.004 | <b>-0.070</b>      | 0.025 | <b>0.011</b>   | 0.004 | 0.024                   | 0.074 | <b>0.031</b>   | 0.013 |
| Pulmonary Circulation     | -0.012             | 0.014 | 0.005          | 0.003 | -0.006             | 0.014 | 0.005          | 0.003 | -0.009                  | 0.036 | 0.007          | 0.006 |
| Stroke                    | -0.011             | 0.011 | <b>0.010</b>   | 0.002 | -0.005             | 0.011 | <b>0.011</b>   | 0.002 | 0.001                   | 0.029 | <b>0.016</b>   | 0.005 |
| Type 2 Diabetes Mellitus  | <b>-0.035</b>      | 0.010 | <b>0.008</b>   | 0.002 | <b>-0.025</b>      | 0.010 | <b>0.008</b>   | 0.002 | <b>-0.091</b>           | 0.024 | 0.004          | 0.005 |

Notes: b = maximum likelihood estimate of the unstandardized regression coefficient; SE = estimated standard error; Highlighted coefficients have a p-value > 0.05.

Web Table 4. Cox hazard regression parameter estimates for baseline and fixed effects models using ordinal birth weight.

| Outcome                   | Model         | Birth Weight (g) | 1973-1995     |       |              |        |        |
|---------------------------|---------------|------------------|---------------|-------|--------------|--------|--------|
|                           |               |                  | B             | SE    | HR           | 95%LCL | 95%UCL |
| <b>Mortality</b>          |               |                  |               |       |              |        |        |
| Died After 1st Year       | Baseline      | ≤ 2500           | 0.764         | 0.045 | 2.146        | 1.966  | 2.343  |
|                           |               | 2501-3000        | 0.291         | 0.029 | 1.338        | 1.265  | 1.415  |
|                           |               | 3001-3500        | 0.080         | 0.021 | 1.084        | 1.039  | 1.130  |
|                           |               | ≥ 4001           | <b>0.003</b>  | 0.026 | <b>1.003</b> | 0.954  | 1.056  |
|                           | Fixed effects | ≤ 2500           | 1.104         | 0.093 | 3.016        | 2.515  | 3.618  |
|                           |               | 2501-3000        | 0.364         | 0.055 | 1.439        | 1.292  | 1.603  |
|                           |               | 3001-3500        | 0.121         | 0.038 | 1.129        | 1.048  | 1.215  |
|                           |               | ≥ 4001           | <b>-0.018</b> | 0.046 | <b>0.983</b> | 0.898  | 1.076  |
| Cardiac-related Death     | Baseline      | ≤ 2500           | 0.988         | 0.139 | 2.686        | 2.046  | 3.526  |
|                           |               | 2501-3000        | 0.326         | 0.096 | 1.385        | 1.148  | 1.672  |
|                           |               | 3001-3500        | <b>0.106</b>  | 0.073 | <b>1.112</b> | 0.964  | 1.283  |
|                           |               | ≥ 4001           | 0.168         | 0.086 | <b>1.183</b> | 0.999  | 1.402  |
|                           | Fixed effects | ≤ 2500           | 1.459         | 0.325 | 4.302        | 2.274  | 8.139  |
|                           |               | 2501-3000        | 1.003         | 0.220 | 2.725        | 1.771  | 4.193  |
|                           |               | 3001-3500        | 0.428         | 0.150 | 1.533        | 1.143  | 2.057  |
|                           |               | ≥ 4001           | 0.340         | 0.172 | 1.404        | 1.002  | 1.969  |
| <b>Physical Morbidity</b> |               |                  |               |       |              |        |        |
| Hypertension              | Baseline      | ≤ 2500           | 0.456         | 0.073 | 1.578        | 1.368  | 1.821  |
|                           |               | 2501-3000        | 0.282         | 0.044 | 1.326        | 1.217  | 1.445  |
|                           |               | 3001-3500        | 0.153         | 0.033 | 1.166        | 1.092  | 1.244  |
|                           |               | ≥ 4001           | <b>0.033</b>  | 0.043 | <b>1.033</b> | 0.950  | 1.124  |
|                           | Fixed effects | ≤ 2500           | <b>0.268</b>  | 0.178 | <b>1.308</b> | 0.922  | 1.855  |
|                           |               | 2501-3000        | 0.259         | 0.115 | 1.296        | 1.035  | 1.624  |
|                           |               | 3001-3500        | <b>0.079</b>  | 0.078 | <b>1.082</b> | 0.929  | 1.262  |
|                           |               | ≥ 4001           | <b>-0.127</b> | 0.099 | <b>0.881</b> | 0.726  | 1.069  |
| Ischemic Heart Disease    | Baseline      | ≤ 2500           | 0.925         | 0.200 | 2.521        | 1.703  | 3.733  |
|                           |               | 2501-3000        | 0.409         | 0.126 | 1.506        | 1.177  | 1.927  |
|                           |               | 3001-3500        | <b>-0.003</b> | 0.099 | <b>0.997</b> | 0.820  | 1.212  |
|                           |               | ≥ 4001           | <b>-0.161</b> | 0.128 | <b>0.851</b> | 0.662  | 1.095  |
|                           | Fixed effects | ≤ 2500           | <b>0.777</b>  | 0.529 | <b>2.176</b> | 0.772  | 6.132  |
|                           |               | 2501-3000        | 0.714         | 0.335 | 2.043        | 1.059  | 3.941  |
|                           |               | 3001-3500        | <b>-0.149</b> | 0.241 | <b>0.861</b> | 0.537  | 1.381  |
|                           |               | ≥ 4001           | <b>0.219</b>  | 0.284 | <b>1.245</b> | 0.713  | 2.172  |
| Pulmonary Circulation     | Baseline      | ≤ 2500           | 0.357         | 0.126 | 1.429        | 1.116  | 1.829  |
|                           |               | 2501-3000        | <b>0.082</b>  | 0.075 | <b>1.085</b> | 0.937  | 1.258  |
|                           |               | 3001-3500        | <b>0.002</b>  | 0.056 | <b>1.002</b> | 0.898  | 1.118  |
|                           |               | ≥ 4001           | <b>0.022</b>  | 0.073 | <b>1.022</b> | 0.886  | 1.178  |
|                           | Fixed effects | ≤ 2500           | <b>0.341</b>  | 0.297 | <b>1.407</b> | 0.786  | 2.519  |
|                           |               | 2501-3000        | <b>0.234</b>  | 0.182 | <b>1.264</b> | 0.884  | 1.806  |
|                           |               | 3001-3500        | <b>0.012</b>  | 0.122 | <b>1.012</b> | 0.797  | 1.285  |
|                           |               | ≥ 4001           | <b>0.028</b>  | 0.152 | <b>1.029</b> | 0.764  | 1.385  |
| Stroke                    | Baseline      | ≤ 2500           | 0.462         | 0.108 | 1.588        | 1.284  | 1.964  |
|                           |               | 2501-3000        | 0.254         | 0.063 | 1.289        | 1.139  | 1.460  |
|                           |               | 3001-3500        | <b>0.033</b>  | 0.048 | <b>1.033</b> | 0.940  | 1.136  |
|                           |               | ≥ 4001           | <b>0.081</b>  | 0.059 | <b>1.085</b> | 0.966  | 1.218  |
|                           | Fixed effects | ≤ 2500           | <b>0.312</b>  | 0.254 | <b>1.367</b> | 0.832  | 2.247  |
|                           |               | 2501-3000        | 0.425         | 0.147 | 1.530        | 1.147  | 2.042  |
|                           |               | 3001-3500        | <b>0.116</b>  | 0.099 | <b>1.123</b> | 0.924  | 1.364  |
|                           |               | ≥ 4001           | <b>0.152</b>  | 0.122 | <b>1.164</b> | 0.917  | 1.477  |
| Type 2 Diabetes Mellitus  | Baseline      | ≤ 2500           | 0.584         | 0.090 | 1.793        | 1.503  | 2.139  |
|                           |               | 2501-3000        | 0.328         | 0.053 | 1.388        | 1.251  | 1.540  |
|                           |               | 3001-3500        | <b>0.076</b>  | 0.041 | <b>1.079</b> | 0.997  | 1.169  |
|                           |               | ≥ 4001           | <b>-0.046</b> | 0.052 | <b>0.955</b> | 0.864  | 1.057  |
|                           | Fixed effects | ≤ 2500           | 0.537         | 0.206 | 1.711        | 1.142  | 2.563  |
|                           |               | 2501-3000        | 0.518         | 0.120 | 1.679        | 1.328  | 2.123  |
|                           |               | 3001-3500        | 0.200         | 0.083 | 1.222        | 1.039  | 1.436  |
|                           |               | ≥ 4001           | <b>-0.156</b> | 0.101 | <b>0.856</b> | 0.702  | 1.044  |

Notes: b = maximum likelihood estimate of the unstandardized regression coefficient; SE = estimated standard error; HR = hazard ratio; UCL = upper confidence limit; LCL = lower confidence limit; Highlighted coefficients have a p-value > 0.05.

Web Table 4 presents the unstandardized regression coefficients with standard errors and the hazard ratio parameter estimates with 95% confidence intervals associated with the ordinal bins of birth weight across baseline and fixed-effects models. The baseline estimates presented here correspond with the point estimates presented in Figures 1 and 2 within the main paper.

Estimates for fixed-effects models using ordinal representation of birth weight provide a comparison analysis to examine the sibling comparison results absent of assumptions about the underlying pattern (i.e., linear or quadratic) of the associations between birth weight and the indices of mortality and morbidity. Figures 1 and 2 in the main paper provide a graphical comparison of the baseline and fixed-effects models using ordinally represented birth weight. The fixed-effects results using ordinal representation of birth weight give commensurate results with analyses based on linear and quadratic modeling presented in the main analyses. It can be noted, however, that the confidence intervals around fixed-effects estimates using ordinal bins are larger than those presented in the main analyses due to the reduced statistical power in moving from a continuous representation of birth weight to ordinal bins. These results suggest that assumptions about the shape of model fitting using families with multiple offspring (which are the only informative families for the sibling-comparison estimates) do not account for the fixed-effects results using the continuous index of birth weight.

**Web Figure 1.** Baseline and fixed-effects parameter estimates when limiting sample to full-term births only.

Compared with parameter estimates from the main analyses (left column) which included all gestational ages, results from analyses limited to full-term births did not substantially alter the results (right column). This suggests that associations presented in main analyses were not biased by extremely premature or late births. The one exception may be found for type 2 diabetes mellitus; parameters corresponding to the smallest ordinal category of birth weight were attenuated as compared with main analyses though small sample size may have contributed to this attenuation.

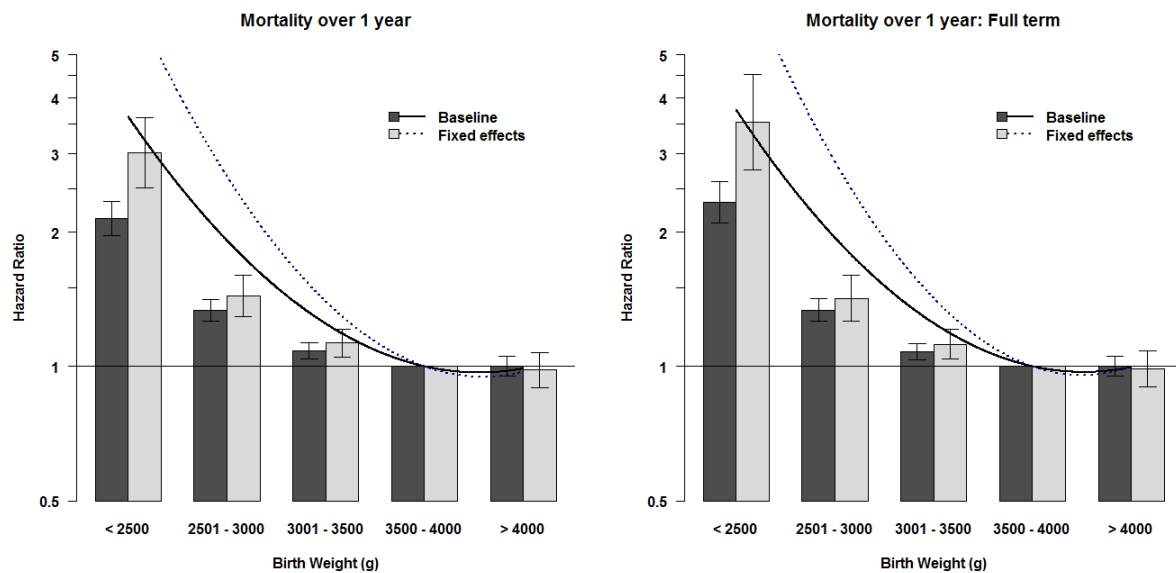



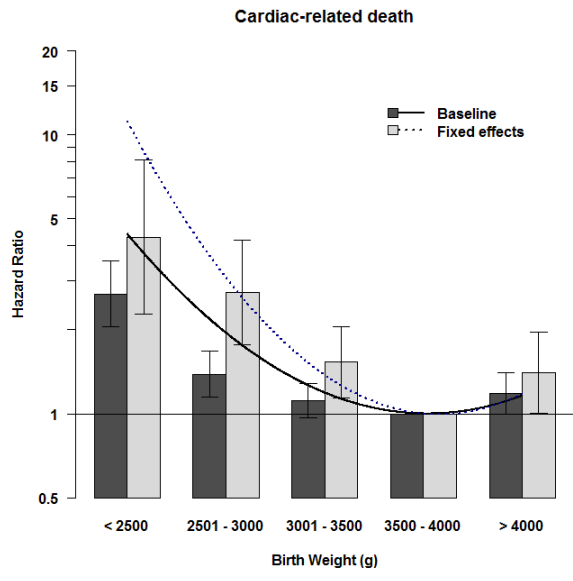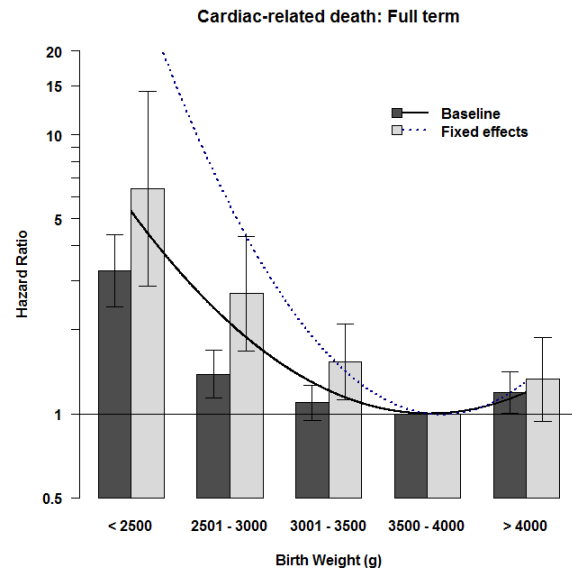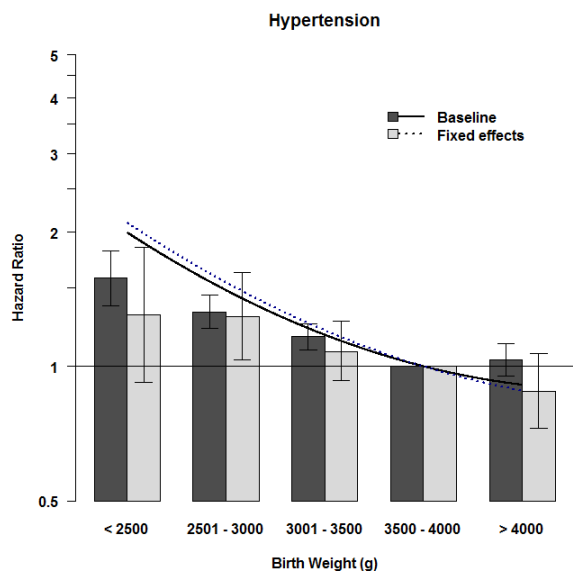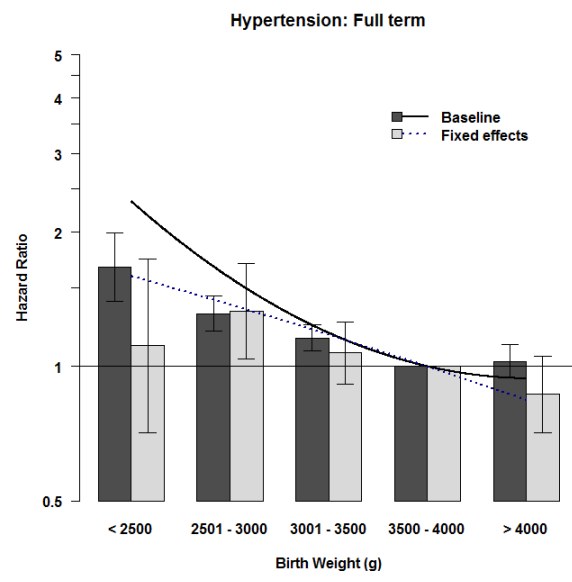

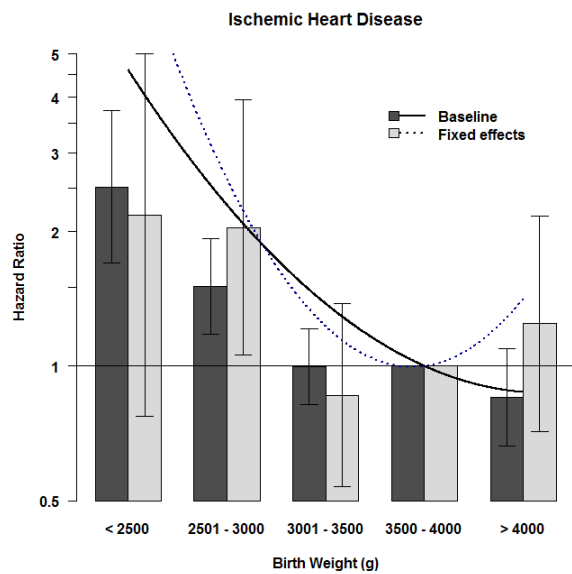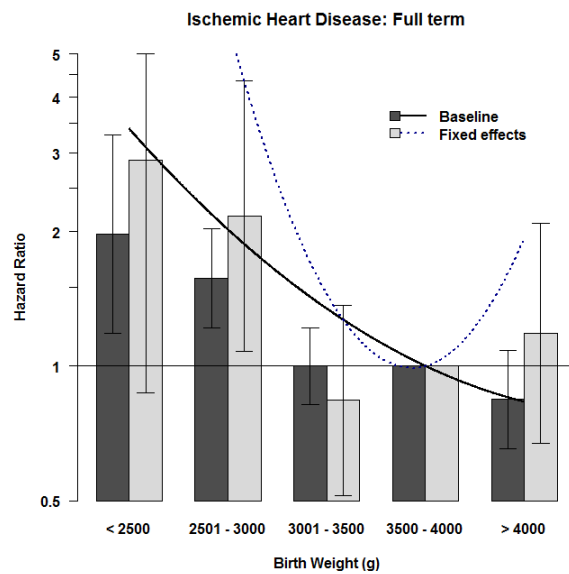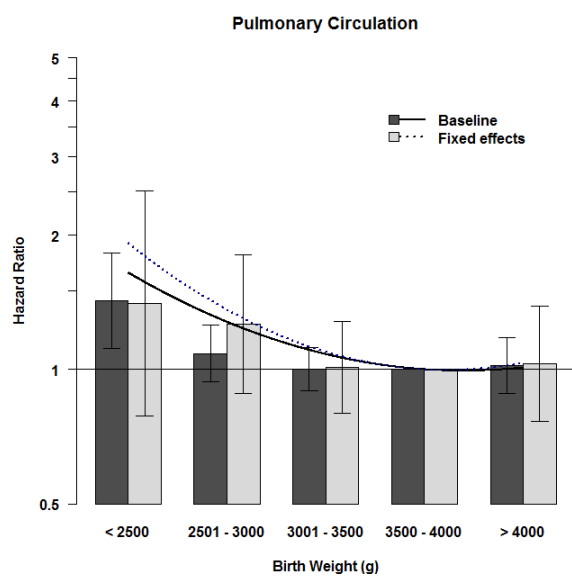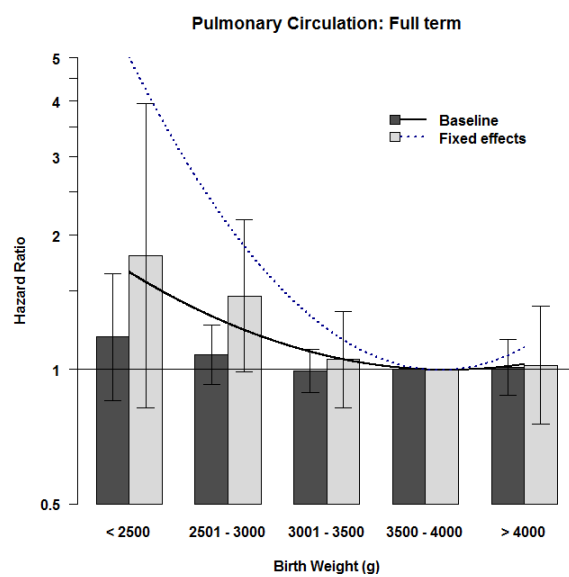

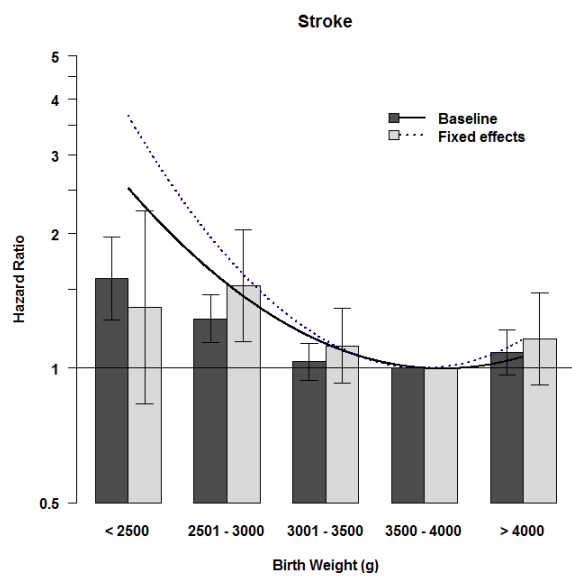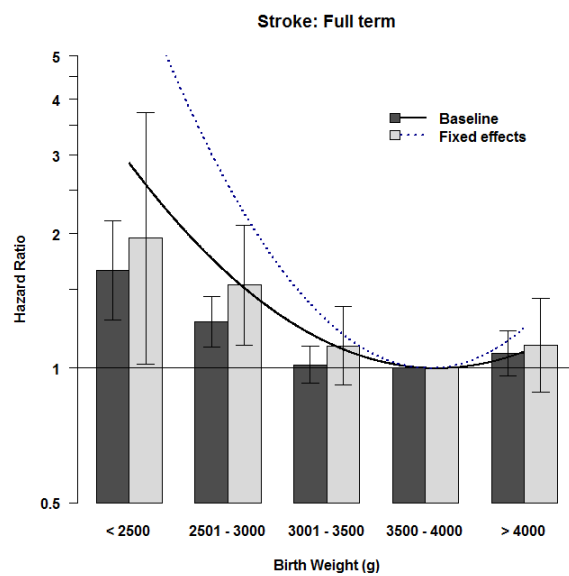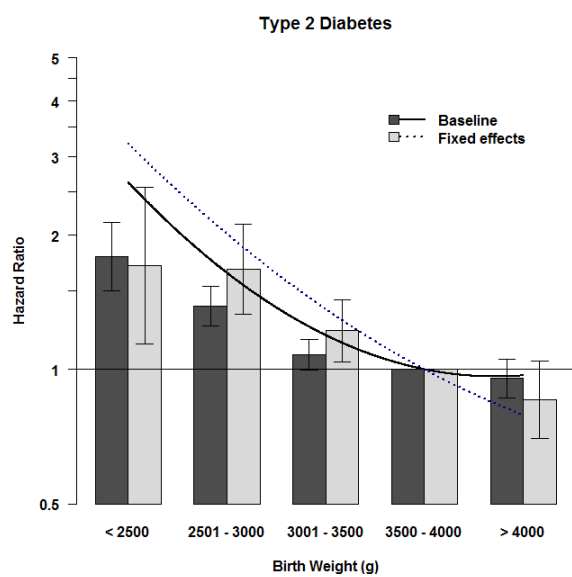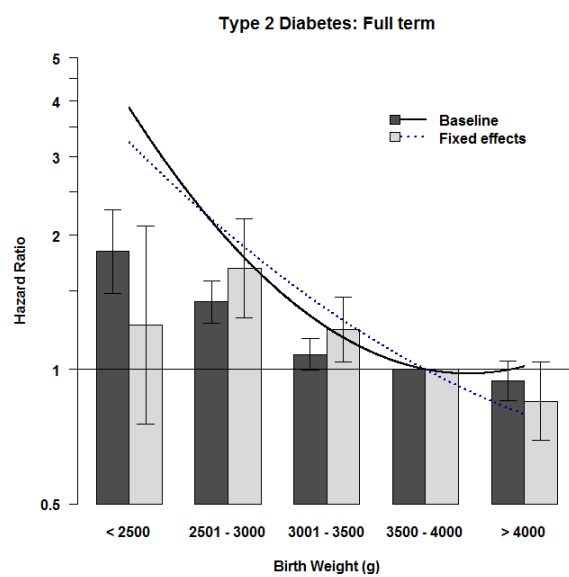

**Web Figure 2.** Comparison of the baseline model association between birth weight and offspring outcomes estimated separately for (a) offspring from families with more than one child and (b) offspring from families with only one child.

Sibling-comparison studies assume that findings from families with multiple offspring generalize to families with only one offspring. The interpretation of the sibling-comparison results could be confounded if the population-based associations were different in offspring who had siblings than in those that are only children. If systematic magnitude differences are found between offspring with siblings and only children, then the reduction or increase in association magnitude found in the fixed-effects models may be due to alternate explanations.

To help assess whether a bias was introduced by analyzing families with multiple offspring, we estimated the population-based estimates between birth weight and offspring outcomes in (a) offspring without siblings and (b) offspring with siblings. Each figure below presents these two baseline models. One model (dark bars with 95% confidence intervals) estimated on the sub-sample of offspring from families with only one offspring within the dataset. The second model (light bars with 95% confidence intervals) was estimated on the sub-sample of offspring from families with more than one child.

The figures show that the baseline associations are largely comparable for the two sub-samples of offspring. The figures also suggest that differences between the sub-samples do not account for differences in the sibling-comparison estimates as compared with the population estimates presented in the main paper. Across outcomes, associations in the two sub-samples are in the same direction and the magnitudes of association greatly overlap. Where the magnitudes differ between sub-samples, birth weights were lowest and therefore the sample sizes were the smallest. Additionally, we found no pattern where magnitudes were always larger in one sub-sample. Overall, this sensitivity analysis suggests that the sibling-comparison results that showed changes in magnitude from the population analyses are not due to different population-based estimates in offspring with siblings than in offspring who are only children.

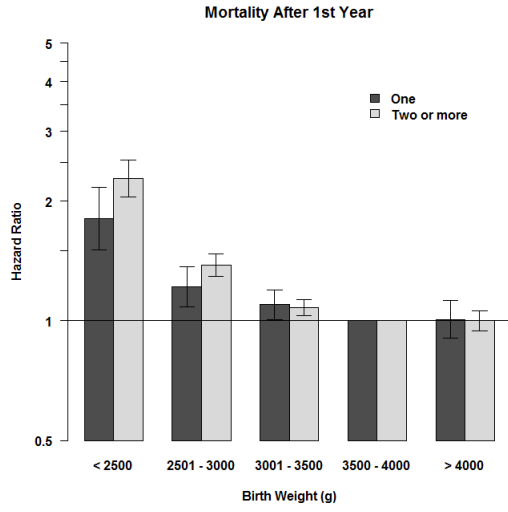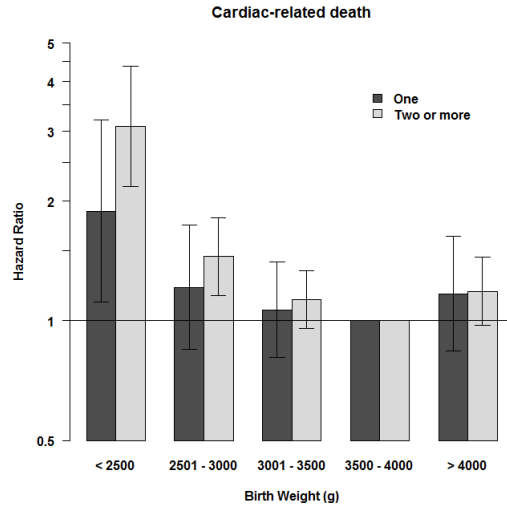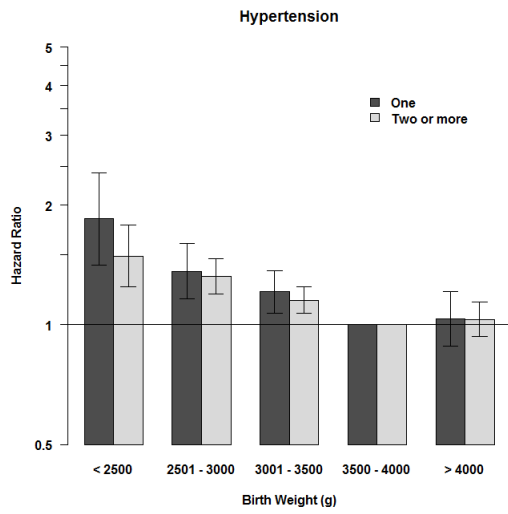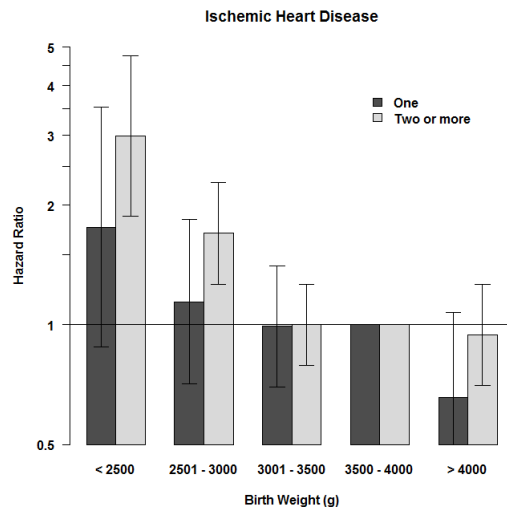

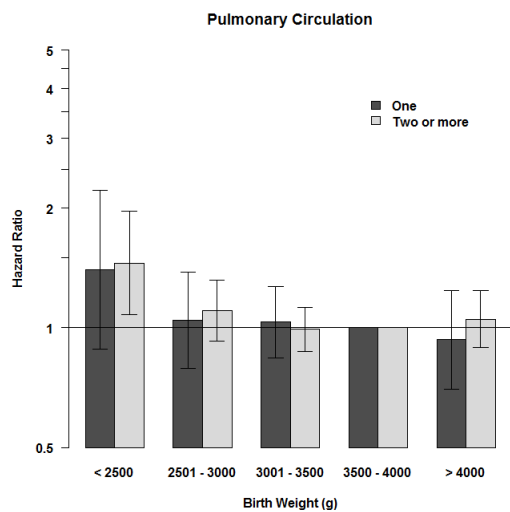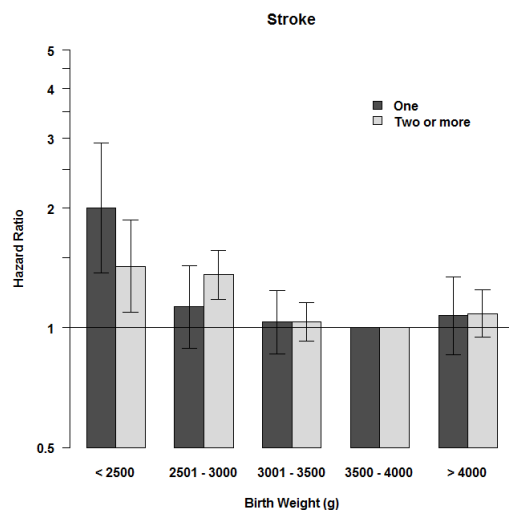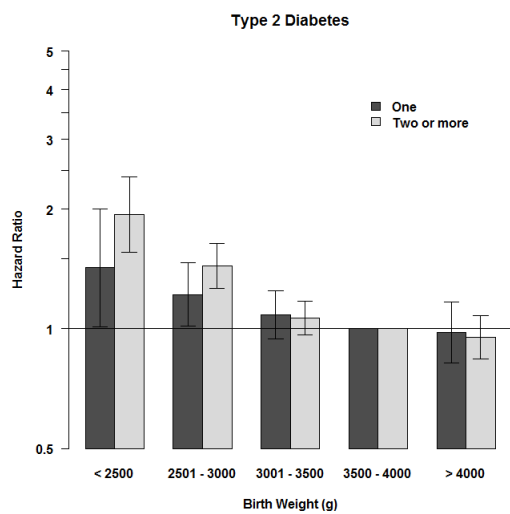

## Web References

1. Centre for Epidemiology, National Board of Health and Welfare. *The Swedish Medical Birth Register — A Summary of Content and Quality*. Stockholm, Sweden: National Board of Health and Welfare; 2003.
2. Cnattingius S, Ericson A, Gunnarskog J, et al. A quality study of a medical birth registry. *Scand J Soc Med*. 1990; 18(2):143–148.
3. Statistics Sweden. *Multi-Generation Register 2005 — A Description of Contents and Quality*. Örebro, Sweden: Statistics Sweden; 2006.
4. Centre for Epidemiology, National Board of Health and Welfare. *The Swedish Hospital Discharge Register*. Stockholm, Sweden: National Board of Health and Welfare; 2005.  
<http://www.socialstyrelsen.se/en/statistics/statsbysubject/the+swedish+hospital+discharge+register.htm>.
5. World Health Organization. *International Classification of Diseases*. Geneva, Switzerland: World Health Organization; 1992.
6. Fazel S, Grann M. The population impact of severe mental illness on violent crime. *Am J Psychiatry*. 2006;163(8):1397–1403.
7. Swedish National Agency for Education. <http://www.skolverket.se/>.
8. LISA database. [http://www.scb.se/pages/list\\_257743.aspx](http://www.scb.se/pages/list_257743.aspx).
9. Burnham KP, Anderson DR. *Model Selection and Multimodel Inference: A Practical Information-Theoretical Approach*. 2nd ed. New York, NY: Springer Publishing Company; 2002.
